# Supplementary material for: Protective Effects of Korean Herbal Remedy against Airway Inflammation in an Allergic Asthma by Suppressing Eosinophil Recruitment and Infiltration in Lung
Source: MDPI journal article supplement (doi:10.3390/antiox10010006), 2020-12-23
Supplement: s1 [file s1]

| Primary ID       | Neutral<br>mass<br>(Da) | m/z      | Retention time<br>(min) | Accepted Description                  | Accepted ID  |
|------------------|-------------------------|----------|-------------------------|---------------------------------------|--------------|
| 0.08_158.9681m/z |                         | 158.9681 | 0.08                    | Allyl methyl selenide                 | CSID10338214 |
| 0.45_315.8585m/z |                         | 315.8585 | 0.45                    | 3,5-Dibromo-4-hydroxybenzamide        | CSID2282682  |
| 0.45_496.9419m/z |                         | 496.9419 | 0.45                    | aerophobin 1                          | CSID8226207  |
| 0.45_440.9215m/z |                         | 440.9215 | 0.45                    | Calcium dobessilate                   | CSID27837    |
| 0.45_306.5211m/z |                         | 306.5211 | 0.45                    | Chikusetsusaponin III                 | CSID29273184 |
| 0.46_390.8956m/z |                         | 390.8956 | 0.46                    | Triclosan sulfate                     | CSID30778644 |
| 0.47_323.1870m/z |                         | 323.187  | 0.47                    | Tilmicosin phosphate                  | CSID4445657  |
| 0.48_258.8963m/z |                         | 258.8963 | 0.48                    | Methyl 2,3-dibromo-2-methylpropanoate | CSID465481   |
| 0.48_266.9374m/z |                         | 266.9374 | 0.48                    | Rhodanine                             | CSID1013337  |
| 0.49_159.0248m/z |                         | 159.0248 | 0.49                    | 2,4-Difluorobenzoic acid              | CSID66716    |
| 0.49_196.0032m/z |                         | 196.0032 | 0.49                    | Phenylsulfamic acid                   | CSID381241   |
| 0.50_296.9564m/z |                         | 296.9564 | 0.5                     | 1-O-Arsonopentofuranose               | CSID35032430 |
| 0.50_311.1825m/z |                         | 311.1825 | 0.5                     | 6-Hydroxypentadecanedioic acid        | CSID35013393 |
| 0.50_201.1295m/z |                         | 201.1295 | 0.5                     | a-yl decanoate                        | CSID4444745  |
| 0.50_159.0926m/z |                         | 159.0926 | 0.5                     | bamipine hydrochloride                | CSID108372   |
| 0.50_223.9985m/z |                         | 223.9985 | 0.5                     | carzenide                             | CSID8410     |
| 0.50_280.1626m/z |                         | 280.1626 | 0.5                     | Chivosazole C                         | CSID10218297 |
| 0.50_429.2336m/z |                         | 429.2336 | 0.5                     | Diammonium Glycyrrhizinate            | CSID571005   |
| 0.50_452.9233m/z |                         | 452.9233 | 0.5                     | Dichlone                              | CSID8039     |
| 0.50_279.1572m/z |                         | 279.1572 | 0.5                     | Dronedarone                           | CSID180996   |
| 0.50_261.0441m/z |                         | 261.0441 | 0.5                     | Fluorouracil                          | CSID3268     |
| 0.50_654.8783m/z |                         | 654.8783 | 0.5                     | Iodohippurate sodium                  | CSID8294     |
| 0.50_192.1202m/z |                         | 192.1202 | 0.5                     | Pyrvinium                             | CSID21125    |
| 0.50_213.1286m/z |                         | 213.1286 | 0.5                     | Synaptophysin factor K1               | CSID4444751  |
| 0.50_123.0737m/z |                         | 123.0737 | 0.5                     | Veliparib                             | CSID10134775 |
| 0.51_124.0805m/z |                         | 124.0805 | 0.51                    | 3-Hydroxydodecanedioic acid           | CSID13628081 |
| 0.51_366.2068m/z |                         | 366.2068 | 0.51                    | 6-O-DesmethylDonepezil                | CSID21627304 |
| 0.51_396.2179m/z |                         | 396.2179 | 0.51                    | benzyl cetraxate                      | CSID21864808 |

|                  |          |                                                  |              |
|------------------|----------|--------------------------------------------------|--------------|
| 0.51_154.0935m/z | 154.0935 | 0.51 fenazaquin                                  | CSID77874    |
| 0.51_164.1074m/z | 164.1074 | 0.51 hydroquinidine                              | CSID391215   |
| 0.51_556.2785m/z | 556.2785 | 0.51 Leu-enkephalin                              | CSID406229   |
| 0.51_269.0624m/z | 269.0624 | 0.51 L-Homocystine                               | CSID388664   |
| 0.51_527.3428m/z | 527.3428 | 0.51 melperone                                   | CSID14646    |
| 0.51_146.0882m/z | 146.0882 | 0.51 Meptin                                      | CSID4747     |
| 0.51_572.2951m/z | 572.2951 | 0.51 Moxilubant maleate                          | CSID8135368  |
| 0.51_585.2892m/z | 585.2892 | 0.51 Ouabain                                     | CSID388599   |
| 0.51_394.2147m/z | 394.2147 | 0.51 Tamoxifen                                   | CSID2015313  |
| 0.51_147.1192m/z | 147.1192 | 0.51 Triethyl borate                             | CSID8659     |
| 0.52_729.2991m/z | 729.2991 | 0.52 (1R)-2-Phenylcyclopropanamine sulfate (2:1) | CSID28290625 |
| 0.52_806.2963m/z | 806.2963 | 0.52 Golvatinib tartrate                         | CSID30790729 |
| 0.52_833.2931m/z | 833.2931 | 0.52 halopemide                                  | CSID58938    |
| 0.52_713.3157m/z | 713.3157 | 0.52 Hycanthone                                  | CSID3508     |
| 0.52_757.3045m/z | 757.3045 | 0.52 Isouvaretin                                 | CSID133675   |
| 0.52_459.2515m/z | 459.2515 | 0.52 lifarizine                                  | CSID64440    |
| 0.52_991.3358m/z | 991.3358 | 0.52 Maltohexaose                                | CSID388684   |
| 0.52_817.2943m/z | 817.2943 | 0.52 Nodakenin                                   | CSID65952    |
| 0.52_927.3123m/z | 927.3123 | 0.52 Pelitrexol                                  | CSID4953371  |
| 0.52_291.1681m/z | 291.1681 | 0.52 Terit                                       | CSID35605    |
| 0.53_798.3046m/z | 798.3046 | 0.53 2''-Adenylylgentamicin A                    | CSID30791501 |
| 0.53_653.2992m/z | 653.2992 | 0.53 aceprometazine                              | CSID24249    |
| 0.53_131.0943m/z | 131.0943 | 0.53 carisoprodol                                | CSID2478     |
| 0.53_513.2627m/z | 513.2627 | 0.53 DEXAMETHASONE TEBUTATE                      | CSID16736122 |
| 0.53_207.0561m/z | 207.0561 | 0.53 Isoflurophate                               | CSID5723     |
| 0.53_499.2448m/z | 499.2448 | 0.53 lofentanil oxalate                          | CSID58946    |
| 0.53_491.2724m/z | 491.2724 | 0.53 Ziziphin                                    | CSID30791203 |
| 0.54_347.1345m/z | 347.1345 | 0.54 Deutzioside                                 | CSID391588   |
| 0.54_236.9150m/z | 236.915  | 0.54 dimexano                                    | CSID14387    |
| 0.55_221.0283m/z | 221.0283 | 0.55 (E)-Nitrofurazone                           | CSID4566720  |
| 0.55_143.0375m/z | 143.0375 | 0.55 4-Chloro-1,3-benzenediamine                 | CSID19941    |

|                   |          |                                        |              |
|-------------------|----------|----------------------------------------|--------------|
| 0.55_365.1207m/z  | 365.1207 | 0.55 Abietin                           | CSID4444067  |
| 0.55_177.0313m/z  | 177.0313 | 0.55 Butadiynyl phenyl ketone          | CSID515451   |
| 0.55_223.0292m/z  | 223.0292 | 0.55 camalexin                         | CSID552646   |
| 0.55_214.0152m/z  | 214.0152 | 0.55 Carmustine                        | CSID2480     |
| 0.55_1013.1093m/z | 1013.109 | 0.55 cefditoren                        | CSID8046534  |
| 0.55_333.9784m/z  | 333.9784 | 0.55 Diclofenac potassium              | CSID59753    |
| 0.55_541.0243m/z  | 541.0243 | 0.55 dithiazanine iodide               | CSID4642986  |
| 0.55_311.0388m/z  | 311.0388 | 0.55 Furamizole                        | CSID4527168  |
| 0.55_933.4574m/z  | 933.4574 | 0.55 Indolapril hydrochloride          | CSID8632692  |
| 0.55_304.8466m/z  | 304.8466 | 0.55 Samarium                          | CSID22391    |
| 0.56_381.0945m/z  | 381.0945 | 0.56 Chryso-obtusin                    | CSID136879   |
| 0.56_341.0379m/z  | 341.0379 | 0.56 Thiourocanic acid                 | CSID4444356  |
| 0.57_219.0358m/z  | 219.0358 | 0.57 1-Chloro-1-phenylsilolane         | CSID9416070  |
| 0.57_955.3555m/z  | 955.3555 | 0.57 Batimastat                        | CSID4515033  |
| 0.57_242.9350m/z  | 242.935  | 0.57 dichlorvos                        | CSID2931     |
| 0.57_293.0784m/z  | 293.0784 | 0.57 pinostrobin                       | CSID65961    |
| 0.57_164.0369m/z  | 164.0369 | 0.57 Tiopronin                         | CSID5283     |
| 0.58_406.9754m/z  | 406.9754 | 0.58 ethion                            | CSID3171     |
| 0.58_286.9644m/z  | 286.9644 | 0.58 pralidoxime iodide                | CSID13233097 |
| 0.59_202.9984m/z  | 202.9984 | 0.59 7-chloroquinazolin-4-ol           | CSID208976   |
| 0.59_351.0799m/z  | 351.0799 | 0.59 Milneb                            | CSID83240    |
| 0.59_203.0614m/z  | 203.0614 | 0.59 protionamide                      | CSID579891   |
| 0.61_252.9822m/z  | 252.9822 | 0.61 6,7-Dichloro-2-dibenzofuranol     | CSID10128421 |
| 0.61_162.0582m/z  | 162.0582 | 0.61 entadamide A                      | CSID4943641  |
| 0.61_132.9932m/z  | 132.9932 | 0.61 Methyl mesylate                   | CSID4013     |
| 0.62_471.0646m/z  | 471.0646 | 0.62 Calcium Gluconate Monohydrate     | CSID24590783 |
| 0.62_183.1197m/z  | 183.1197 | 0.62 Heptyl thiol                      | CSID79206    |
| 0.63_521.0464m/z  | 521.0464 | 0.63 6-O-Sulfo-alpha-D-galactopyranose | CSID388504   |
| 0.63_425.0081m/z  | 425.0081 | 0.63 Triafur                           | CSID55149    |
| 0.64_297.0070m/z  | 297.007  | 0.64 Fenclofenac                       | CSID58860    |
| 0.64_409.0245m/z  | 409.0245 | 0.64 guaiaicol sulfate                 | CSID21078    |
| 0.65_288.1194m/z  | 288.1194 | 0.65 Clavamycin E                      | CSID30791679 |

|                  |                  |                                              |              |
|------------------|------------------|----------------------------------------------|--------------|
| 0.67_326.0356m/z | 326.0356         | 0.67 Gerrardine                              | CSID391000   |
| 0.67_477.0114m/z | 477.0114         | 0.67 primisulfuron [ANSI]                    | CSID82871    |
| 0.67_270.9887m/z | 270.9887         | 0.67 Vanillic acid 4-sulfate                 | CSID339308   |
| 0.71_487.0399m/z | 487.0399         | 0.71 ethoate-methyl                          | CSID7996     |
| 0.71_299.0096m/z | 299.0096         | 0.71 N,N,1,2,3-Pentafluoro-3-diaziridinamine | CSID465244   |
| 0.72_863.3842m/z | 863.3842         | 0.72 ethaverine hydrochloride                | CSID13199    |
| 0.72_194.0319m/z | 194.0319         | 0.72 fosfocreatinine                         | CSID64349    |
| 0.72_302.1356m/z | 302.1356         | 0.72 Salcaprozate sodium                     | CSID139678   |
| 0.74_290.1025m/z | 290.1025         | 0.74 Acronycidine                            | CSID86397    |
| 0.77_229.9849m/z | 229.9849         | 0.77 nimidane                                | CSID58902    |
| 0.80_305.1033m/z | 305.1033         | 0.8 heraclenol                               | CSID290709   |
| 0.82_235.1290m/z | 235.129          | 0.82 2,6-Diamino-7-hydroxynonanedioic acid   | CSID391749   |
| 0.82_207.1082m/z | 207.1082         | 0.82 Adapalene                               | CSID54244    |
| 0.82_326.1401m/z | 326.1401         | 0.82 Amurine                                 | CSID4586084  |
| 0.82_329.1023m/z | 329.1023         | 0.82 Betagarin                               | CSID390742   |
| 0.82_297.6796m/z | 297.6796         | 0.82 Bis(5'-guanosyl) tetraphosphate         | CSID144813   |
| 0.82_193.1066m/z | 193.1066         | 0.82 Bortezomib                              | CSID343402   |
| 0.82_270.1719m/z | 270.1719         | 0.82 Fusidate Sodium                         | CSID2298842  |
| 0.82_253.1285m/z | 253.1285         | 0.82 His-pro                                 | CSID10608298 |
| 0.82_123.0553m/z | 123.0553         | 0.82 Isonicotinamide                         | CSID14346    |
| 0.82_262.1408m/z | 262.1408         | 0.82 Macrophylline                           | CSID4445052  |
| 0.82_228.0832m/z | 228.0832         | 0.82 N-Acetyl-D-fucosamine                   | CSID10128481 |
| 0.82_294.1139m/z | 294.1139         | 0.82 Oxaprozin                               | CSID4453     |
| 0.82_209.1378m/z | 209.1378         | 0.82 Propanoylagmatine                       | CSID388817   |
| 0.82_276.0973m/z | 276.0973         | 0.82 triamterene                             | CSID5345     |
| 0.82_147.1188m/z | 147.1188         | 0.82 Triethyl borate                         | CSID8659     |
| 0.82_224.1313m/z | 224.1313         | 0.82 Vaspit                                  | CSID13085382 |
| 0.83_517.2864m/z | 517.2864         | 0.83 (+)-thiobinupharidine                   | CSID390975   |
| 0.83_172.1318n   | 172.1318 195.121 | 0.83 Acetylagmatine                          | CSID388732   |
| 0.83_320.1850m/z | 320.185          | 0.83 Coronatine                              | CSID82784    |

|                  |          |                                      |              |
|------------------|----------|--------------------------------------|--------------|
| 0.83_254.1733m/z | 254.1733 | 0.83 EDC7F4TF12                      | CSID68969    |
| 0.83_348.0887m/z | 348.0887 | 0.83 N-Glycolylneuraminic acid       | CSID110352   |
| 0.83_383.1939m/z | 383.1939 | 0.83 O-Acetylcypholophine            | CSID391156   |
| 0.84_359.1962m/z | 359.1962 | 0.84 Risocaine                       | CSID6906     |
| 0.85_339.1689m/z | 339.1689 | 0.85 amquinat                        | CSID26433    |
| 0.85_387.1923m/z | 387.1923 | 0.85 Olodaterol                      | CSID9679097  |
| 0.85_417.2200m/z | 417.22   | 0.85 Zanoterone                      | CSID8020541  |
| 0.87_161.0783m/z | 161.0783 | 0.87 Dimethyl (phenylethynyl) silane | CSID3333176  |
| 0.87_478.2223m/z | 478.2223 | 0.87 Lacidipine                      | CSID4470736  |
| 0.88_276.1582m/z | 276.1582 | 0.88 HOMATROPINE                     | CSID16498795 |
| 0.88_248.1595m/z | 248.1595 | 0.88 lys-thr                         | CSID13177972 |
| 0.89_212.1196m/z | 212.1196 | 0.89 mefenorex                       | CSID20467    |
| 0.89_199.0639m/z | 199.0639 | 0.89 Monuron                         | CSID8470     |
| 0.89_258.1463m/z | 258.1463 | 0.89 Stovine                         | CSID10312    |
| 0.97_475.1317m/z | 475.1317 | 0.97 2,4-DIPHENYLTHIAZOLE            | CSID536201   |
| 0.99_260.2008m/z | 260.2008 | 0.99 Eperisone                       | CSID3123     |
| 0.99_403.1034m/z | 403.1034 | 0.99 Frangulin B                     | CSID391087   |
| 1.00_197.0474m/z | 197.0474 | 1 clominorex                         | CSID18605    |
| 1.00_385.0923m/z | 385.0923 | 1 isoscopoletin                      | CSID63089    |
| 1.00_565.1714m/z | 565.1714 | 1 protoaphin aglucone                | CSID26330536 |
| 1.02_282.1500m/z | 282.15   | 1.02 Coumarin 106                    | CSID90670    |
| 1.02_203.1061m/z | 203.1061 | 1.02 Tremetone                       | CSID71024    |
| 1.03_423.2235m/z | 423.2235 | 1.03 pinoxaden                       | CSID182281   |
| 1.05_338.1942m/z | 338.1942 | 1.05 Butoctamide semisuccinate       | CSID2392     |
| 1.05_251.1627m/z | 251.1627 | 1.05 frescolat ML                    | CSID55982    |
| 1.05_499.1442m/z | 499.1442 | 1.05 MTX sodium                      | CSID571037   |
| 1.08_186.1253m/z | 186.1253 | 1.08 6-ketoprostaglandin fl          | CSID4444411  |
| 1.08_230.0599m/z | 230.0599 | 1.08 alpha-L-Oxathionyl-cytidine     | CSID389999   |
| 1.08_484.2617m/z | 484.2617 | 1.08 Bekanamycin                     | CSID388449   |
| 1.08_185.1361m/z | 185.1361 | 1.08 Carboprost                      | CSID4444532  |
| 1.09_333.0721m/z | 333.0721 | 1.09 6-Deoxyjacareubin               | CSID4444948  |
| 1.10_209.1073m/z | 209.1073 | 1.1 spironolactone                   | CSID5628     |

|                    |                     |                                                         |              |
|--------------------|---------------------|---------------------------------------------------------|--------------|
| 1. 11_183. 1205m/z | 183. 1205           | 1. 11 Kendall's Compound G                              | CSID16735652 |
| 1. 12_279. 1473m/z | 279. 1473           | 1. 12 (8R, 9S)-fumigaclavine B                          | CSID10207493 |
| 1. 12_153. 1091m/z | 153. 1091           | 1. 12 11-KETOETIOCHOLANOLONE                            | CSID92021    |
| 1. 12_328. 1812n   | 328. 1812 329. 1885 | 1. 12 4-(3, 5-Diphenylcyclohexyl)phenol                 | CSID10128318 |
| 1. 12_255. 1823m/z | 255. 1823           | 1. 12 Aloperine                                         | CSID10393201 |
| 1. 12_147. 1201m/z | 147. 1201           | 1. 12 n-Dibutyl sulfide                                 | CSID10536    |
| 1. 12_168. 0767m/z | 168. 0767           | 1. 12 spinacine                                         | CSID323081   |
| 1. 14_573. 3185m/z | 573. 3185           | 1. 14 2-Hydroxyestrone                                  | CSID389514   |
| 1. 14_234. 1364m/z | 234. 1364           | 1. 14 Androsterone glucuronide                          | CSID102793   |
| 1. 14_173. 0991m/z | 173. 0991           | 1. 14 Bis(trimethylsilyl) camphorate                    | CSID29272943 |
| 1. 14_397. 2290m/z | 397. 229            | 1. 14 Mebicar                                           | CSID109042   |
| 1. 15_517. 2996m/z | 517. 2996           | 1. 15 3-O-(alpha-L-oliviosyl)oleandolide                | CSID391741   |
| 1. 16_379. 2186m/z | 379. 2186           | 1. 16 Cebranopadol                                      | CSID29398942 |
| 1. 17_528. 2957m/z | 528. 2957           | 1. 17 doramapimod                                       | CSID137746   |
| 1. 19_308. 1856m/z | 308. 1856           | 1. 19 Buflomedil                                        | CSID2373     |
| 1. 19_233. 1541m/z | 233. 1541           | 1. 19 Pristimerin                                       | CSID140269   |
| 1. 21_181. 1063m/z | 181. 1063           | 1. 21 (2S)-2-Carboxy-1, 1-dimethylpiperidinium          | CSID4444556  |
| 1. 22_224. 0926m/z | 224. 0926           | 1. 22 DIOXACARB                                         | CSID21901    |
| 1. 24_475. 1321m/z | 475. 1321           | 1. 24 2, 4-DIPHENYLTHIAZOLE                             | CSID536201   |
| 1. 24_472. 2104m/z | 472. 2104           | 1. 24 Dabigatran                                        | CSID187412   |
| 1. 27_292. 1326m/z | 292. 1326           | 1. 27 Naproanilide                                      | CSID36918    |
| 1. 29_313. 0681m/z | 313. 0681           | 1. 29 Luteoforol                                        | CSID389678   |
| 1. 29_131. 0607m/z | 131. 0607           | 1. 29 Quinoxaline                                       | CSID21106470 |
| 1. 29_232. 1119m/z | 232. 1119           | 1. 29 Valerosidatum                                     | CSID8632465  |
| 1. 32_620. 3219m/z | 620. 3219           | 1. 32 Glycylalanylprolylmethionylphenylalanylvalinamide | CSID35013564 |
| 1. 36_173. 1363m/z | 173. 1363           | 1. 36 Oxapium                                           | CSID4452     |
| 1. 38_153. 0765m/z | 153. 0765           | 1. 38 Nopaline                                          | CSID390247   |
| 1. 39_599. 3330m/z | 599. 333            | 1. 39 Cyclo-(D-Leu-L-Trp)                               | CSID9360730  |
| 1. 41_279. 1476m/z | 279. 1476           | 1. 41 (8R, 9S)-fumigaclavine B                          | CSID10207493 |
| 1. 41_217. 1207m/z | 217. 1207           | 1. 41 1-linolenoyl-sn-glycero-3-phosphate               | CSID29368413 |

|                    |           |                                                          |              |
|--------------------|-----------|----------------------------------------------------------|--------------|
| 1. 41_408. 2165m/z | 408. 2165 | 1. 41 ancistrocladine                                    | CSID142055   |
| 1. 41_193. 1197m/z | 193. 1197 | 1. 41 Diafenthiuron                                      | CSID2298854  |
| 1. 42_223. 1584m/z | 223. 1584 | 1. 42 Menatetrenone                                      | CSID4445530  |
| 1. 43_184. 1084m/z | 184. 1084 | 1. 43 6?, 9-difluoro-11?-hydroxy<br>progesterone         | CSID224469   |
| 1. 43_202. 1279m/z | 202. 1279 | 1. 43 Telecinobufagin                                    | CSID228185   |
| 1. 44_440. 7524m/z | 440. 7524 | 1. 44 OCTACHLORODIBENZOFURAN                             | CSID35020    |
| 1. 46_240. 1498m/z | 240. 1498 | 1. 46 (-)-2, 3-Dehydroemetine                            | CSID19773    |
| 1. 46_154. 0870m/z | 154. 087  | 1. 46 Ruxolitinib                                        | CSID25027389 |
| 1. 47_260. 1688m/z | 260. 1688 | 1. 47 Cucurbitacin F                                     | CSID4444697  |
| 1. 49_141. 0733m/z | 141. 0733 | 1. 49 3, 4-Diethylthiophene                              | CSID454231   |
| 1. 49_198. 1195m/z | 198. 1195 | 1. 49 Carfentanil                                        | CSID55986    |
| 1. 50_169. 1413m/z | 169. 1413 | 1. 5 6-Silaspiro[5. 5]undecane                           | CSID14690870 |
| 1. 50_359. 2031m/z | 359. 2031 | 1. 5 salirasib                                           | CSID4579849  |
| 1. 52_467. 2569m/z | 467. 2569 | 1. 52 2-Heptyl-1, 3-benzothiazole                        | CSID30777401 |
| 1. 52_147. 1205m/z | 147. 1205 | 1. 52 n-Dibutyl sulfide                                  | CSID10536    |
| 1. 54_226. 1380m/z | 226. 138  | 1. 54 laserpitin                                         | CSID4444857  |
| 1. 55_289. 1687m/z | 289. 1687 | 1. 55 Desipramine                                        | CSID2888     |
| 1. 56_301. 1417m/z | 301. 1417 | 1. 56 Dibutyl phthalate                                  | CSID13837319 |
|                    |           | 2, 2' -                                                  |              |
| 1. 57_248. 9828m/z | 248. 9828 | 1. 57 [Sulfanediylbis(methylene)]dithioph<br>ene         | CSID30776965 |
| 1. 57_185. 1129m/z | 185. 1129 | 1. 57 Hirsutine                                          | CSID2301518  |
| 1. 57_183. 1200m/z | 183. 12   | 1. 57 Tetrahydrocortisone                                | CSID5657     |
| 1. 58_231. 1697m/z | 231. 1697 | 1. 58 Leu-Val                                            | CSID312585   |
| 1. 62_141. 1098m/z | 141. 1098 | 1. 62 6-Silaspiro[3. 5]nonane                            | CSID24607727 |
| 1. 62_305. 1883m/z | 305. 1883 | 1. 62 Retinal 2                                          | CSID4444397  |
| 1. 63_211. 0647m/z | 211. 0647 | 1. 63 1-(Ethyl-disulfanyl)-1-<br>(propylsulfanyl)propane | CSID35013530 |
| 1. 63_393. 2386m/z | 393. 2386 | 1. 63 Rimexolone                                         | CSID4470902  |
| 1. 68_244. 1422m/z | 244. 1422 | 1. 68 Alchorneine                                        | CSID188607   |
| 1. 70_169. 1413m/z | 169. 1413 | 1. 7 6-Silaspiro[5. 5]undecane                           | CSID14690870 |

|                    |                    |                                            |              |
|--------------------|--------------------|--------------------------------------------|--------------|
| 1. 71_539. 9724m/z | 539. 9724          | 1. 71 AIM                                  | CSID82810    |
| 1. 71_331. 1637m/z | 331. 1637          | 1. 71 Hydroxycarteolol                     | CSID111020   |
| 1. 71_202. 1016m/z | 202. 1016          | 1. 71 Linoglriride fumarate                | CSID23942945 |
| 1. 71_168. 0880m/z | 168. 088           | 1. 71 N-cyclopropylammeline                | CSID4881949  |
| 1. 71_163. 0494m/z | 163. 0494          | 1. 71 quindoxin                            | CSID65059    |
| 1. 71_229. 1112m/z | 229. 1112          | 1. 71 Tebuthiuron                          | CSID5190     |
| 1. 74_297. 1060n   | 297. 106 320. 1895 | 1. 74 Afegostat tartrate                   | CSID29324507 |
| 1. 79_188. 0819m/z | 188. 0819          | 1. 79 Amrinone                             | CSID3570     |
| 1. 79_146. 0690m/z | 146. 069           | 1. 79 N,N-Dimethyl-2-pyrimidinamine        | CSID455090   |
| 1. 79_160. 0861m/z | 160. 0861          | 1. 79 N-Isopropyl-2-propanaminium chloride | CSID12616    |
| 1. 82_257. 1985m/z | 257. 1985          | 1. 82 Sparteine                            | CSID17340494 |
| 1. 87_196. 1090m/z | 196. 109           | 1. 87 Megaphone                            | CSID391211   |
| 1. 89_561. 1174m/z | 561. 1174          | 1. 89 CEFATRIZINE PROPYLENE GLYCOLATE      | CSID4918614  |
| 1. 89_527. 0917m/z | 527. 0917          | 1. 89 miloxacin                            | CSID34501    |
| 1. 91_896. 9654m/z | 896. 9654          | 1. 91 aldesulfone sodium                   | CSID8610     |
| 1. 94_127. 0942m/z | 127. 0942          | 1. 94 4-Silaspiro[3.4]octane               | CSID24607729 |
| 1. 95_155. 0901m/z | 155. 0901          | 1. 95 2-(3-Aminopropoxy)guanidine          | CSID112164   |
| 1. 97_615. 3232m/z | 615. 3232          | 1. 97 Moxaverine                           | CSID64045    |
| 2. 08_357. 2175m/z | 357. 2175          | 2. 08 cyclizine lactate                    | CSID64553    |
| 2. 09_101. 0779m/z | 101. 0779          | 2. 09 Silinane                             | CSID10757031 |
| 2. 11_114. 0917m/z | 114. 0917          | 2. 11 Formylpiperidine                     | CSID16486    |
| 2. 14_117. 0413m/z | 117. 0413          | 2. 14 (E)-Azodicarbonamide                 | CSID4575589  |
| 2. 14_186. 0643m/z | 186. 0643          | 2. 14 1-Methoxymethyl-1H-benzotriazole     | CSID472332   |
| 2. 14_934. 9852m/z | 934. 9852          | 2. 14 2'-deoxycytidine-5'-triphosphate     | CSID21232344 |
| 2. 15_319. 1790m/z | 319. 179           | 2. 15 Ansatrienin A                        | CSID4445296  |
| 2. 16_226. 1406m/z | 226. 1406          | 2. 16 Naluzotan                            | CSID9605731  |
| 2. 17_185. 1348m/z | 185. 1348          | 2. 17 Carboprost                           | CSID4444532  |
| 2. 21_261. 1392m/z | 261. 1392          | 2. 21 1,4-Dianilinobenzene                 | CSID6080     |
| 2. 22_417. 2493m/z | 417. 2493          | 2. 22 Tetrahexosylceramide (d18:1/16:0)    | CSID16744945 |
| 2. 23_259. 1624m/z | 259. 1624          | 2. 23 Cucurbitacin L                       | CSID390403   |
| 2. 27_903. 9545m/z | 903. 9545          | 2. 27 N-Isobutylhexacosanamide             | CSID30777296 |



|                    |           |                                                                               |              |
|--------------------|-----------|-------------------------------------------------------------------------------|--------------|
| 2. 27_305. 1751m/z | 305. 1751 | 2. 27 prosolanapyrone II                                                      | CSID9997508  |
| 2. 29_458. 9294m/z | 458. 9294 | 2. 29 Fipronil                                                                | CSID3235     |
| 2. 35_381. 2192m/z | 381. 2192 | 2. 35 emodepside                                                              | CSID5293825  |
| 2. 37_205. 1078m/z | 205. 1078 | 2. 37 (1E)-2-Methyl-1-butene-1-thiol                                          | CSID30777485 |
| 2. 37_143. 0248m/z | 143. 0248 | 2. 37 noxytiolin                                                              | CSID4418329  |
| 2. 39_169. 1414m/z | 169. 1414 | 2. 39 6-Silaspiro[5.5]undecane                                                | CSID14690870 |
| 2. 39_197. 1389m/z | 197. 1389 | 2. 39 Muscarine                                                               | CSID8949     |
| 2. 40_277. 1636m/z | 277. 1636 | 2. 4 Arbekacin                                                                | CSID61936    |
| 2. 40_314. 0498m/z | 314. 0498 | 2. 4 ISAZOFOS                                                                 | CSID35885    |
| 2. 45_249. 1344m/z | 249. 1344 | 2. 45 HISTIDYLPROLINE DIKETOPIPERAZINE                                        | CSID58646    |
| 2. 51_186. 0343m/z | 186. 0343 | 2. 51 Phenethyl isothiocyanate                                                | CSID15870    |
| 2. 52_611. 1945m/z | 611. 1945 | 2. 52 Hesperidin                                                              | CSID10176    |
| 2. 54_179. 1578m/z | 179. 1578 | ( <sup>2</sup> H <sub>4</sub> )-1, 2-<br>2. 54 Ethanediylbis(trimethylsilane) | CSID24607845 |
| 2. 56_646. 0317m/z | 646. 0317 | 2. 56 Amiodarone                                                              | CSID2072     |
| 2. 58_183. 1164m/z | 183. 1164 | 2. 58 Bibenzyl                                                                | CSID7364     |
| 2. 59_396. 2330m/z | 396. 233  | 2. 59 Quinagolide                                                             | CSID2343034  |
| 2. 61_560. 3201m/z | 560. 3201 | 2. 61 Auriculine                                                              | CSID391066   |
| 2. 61_388. 9380m/z | 388. 938  | 2. 61 Fosfomycin calcium monohydrate                                          | CSID10128527 |
| 2. 61_836. 4422m/z | 836. 4422 | 2. 61 midecamycin                                                             | CSID4445365  |
| 2. 62_390. 0195m/z | 390. 0195 | 2. 62 5-HYDROXYMETHYL MELOXICAM                                               | CSID21896764 |
| 2. 64_363. 2112m/z | 363. 2112 | 2. 64 1, 1, 4, 4-TETRAPHENYLBUTANE                                            | CSID120741   |
| 2. 64_257. 0633m/z | 257. 0633 | 2. 64 1-Hydroxyhexane-1, 2, 6-tricarboxylate                                  | CSID23283357 |
| 2. 75_307. 1891m/z | 307. 1891 | 2. 75 Compactin diol lactone                                                  | CSID151560   |
| 2. 76_168. 0887m/z | 168. 0887 | 2. 76 N-cyclopropylammeline                                                   | CSID4881949  |
| 2. 77_310. 1853m/z | 310. 1853 | 2. 77 arg-leu                                                                 | CSID295468   |
| 2. 77_181. 1073m/z | 181. 1073 | 2. 77 Isobutanethiol                                                          | CSID10118    |
| 2. 79_226. 1545m/z | 226. 1545 | 2. 79 Chaksine                                                                | CSID107747   |
| 2. 79_271. 0781m/z | 271. 0781 | 2. 79 S-Methylcysteine                                                        | CSID196235   |
| 2. 81_371. 2372m/z | 371. 2372 | 2. 81 artilide                                                                | CSID116301   |
| 2. 81_294. 0186m/z | 294. 0186 | 2. 81 Pentrinitrol                                                            | CSID14614    |

|                     |                     |                                     |              |
|---------------------|---------------------|-------------------------------------|--------------|
| 2. 81_407. 2581m/z  | 407. 2581           | 2. 81 TESTOSTERONE PHENYLACETATE    | CSID8106825  |
| 2. 86_231. 1248m/z  | 231. 1248           | 2. 86 Tirasemtiv                    | CSID30790768 |
| 2. 91_439. 1308m/z  | 439. 1308           | 2. 91 halopemide                    | CSID58938    |
| 2. 91_595. 1927m/z  | 595. 1927           | 2. 91 Tanaproget                    | CSID3572060  |
| 2. 91_379. 1049m/z  | 379. 1049           | 2. 91 thiotepa                      | CSID5254     |
| 2. 94_525. 2963m/z  | 525. 2963           | 2. 94 Kolanone                      | CSID30791168 |
| 2. 94_433. 2404m/z  | 433. 2404           | 2. 94 usambarensine                 | CSID4444762  |
| 2. 95_474. 9670m/z  | 474. 967            | 2. 95 Tilbroquinol                  | CSID59034    |
| 2. 96_1229. 1474m/z | 1229. 147           | 2. 96 Lifitegrast                   | CSID10139520 |
| 2. 99_179. 0463m/z  | 179. 0463           | 2. 99 naphthal                      | CSID5960     |
| 2. 99_604. 3295m/z  | 604. 3295           | 2. 99 Salmeterol Xinafoate          | CSID51216    |
| 3. 01_127. 0937m/z  | 127. 0937           | 3. 01 4-Silaspiro[3.4]octane        | CSID24607729 |
| 3. 01_192. 1618n    | 192. 1618 385. 2617 | 3. 01 Dodecanedinitrile             | CSID70673    |
| 3. 01_169. 1424m/z  | 169. 1424           | 3. 01 Triethylenetetramine          | CSID21106175 |
| 3. 05_1190. 1273m/z | 1190. 127           | 3. 05 Glycol distearate             | CSID55120    |
| 3. 07_615. 3665m/z  | 615. 3665           | 3. 07 (-)-Santiaguine               | CSID30791163 |
| 3. 07_239. 1498m/z  | 239. 1498           | 3. 07 Pirimicarb                    | CSID29348    |
| 3. 07_371. 2414m/z  | 371. 2414           | 3. 07 THROMBOXANE B2                | CSID4446261  |
| 3. 09_475. 2763m/z  | 475. 2763           | 3. 09 Amastatin                     | CSID388612   |
| 3. 10_389. 2453m/z  | 389. 2453           | 3. 1 12'-Apozeaxanthin              | CSID9275794  |
| 3. 10_407. 2554m/z  | 407. 2554           | 3. 1 Estradiol enanthate            | CSID19815    |
| 3. 14_205. 1783m/z  | 205. 1783           | 3. 14 Butylboronic acid             | CSID19286    |
| 3. 15_545. 3148m/z  | 545. 3148           | 3. 15 Ladostigil                    | CSID181005   |
| 3. 17_319. 1876m/z  | 319. 1876           | 3. 17 (+)-10-Deoxymethynolide       | CSID4445261  |
| 3. 17_243. 1466m/z  | 243. 1466           | 3. 17 prilocaine                    | CSID4737     |
| 3. 19_204. 1140m/z  | 204. 114            | 3. 19 Ampyrone                      | CSID2066     |
| 3. 22_819. 4471m/z  | 819. 4471           | 3. 22 Soyasaponin III               | CSID10245008 |
| 3. 26_430. 2616m/z  | 430. 2616           | 3. 26 disobutamide                  | CSID61837    |
| 3. 27_219. 1407m/z  | 219. 1407           | 3. 27 3-(Methylthio)hexyl butanoate | CSID468337   |
| 3. 27_742. 4322m/z  | 742. 4322           | 3. 27 erythromycin C                | CSID75735    |
| 3. 28_493. 2487m/z  | 493. 2487           | 3. 28 Vorapaxar                     | CSID8252668  |
| 3. 31_351. 2164m/z  | 351. 2164           | 3. 31 15-oxolipoxin A4              | CSID27471351 |

|                   |          |                                                  |              |
|-------------------|----------|--------------------------------------------------|--------------|
| 3.31_360.2156m/z  | 360.2156 | 3.31 Fenpiverinium                               | CSID64566    |
| 3.31_266.1367m/z  | 266.1367 | 3.31 Tiglylcarnitine                             | CSID17216200 |
| 3.33_547.1718m/z  | 547.1718 | 3.33 Modafinil                                   | CSID4088     |
| 3.37_565.1832m/z  | 565.1832 | 3.37 Agrostophyllin                              | CSID391049   |
| 3.37_427.1352m/z  | 427.1352 | 3.37 Droxidopa                                   | CSID83927    |
| 3.41_453.2343m/z  | 453.2343 | 3.41 Trandolapril                                | CSID4588590  |
| 3.41_1129.0841m/z | 1129.084 | 3.41 UDP-3-keto- $\alpha$ -D-glucose             | CSID28533807 |
| 3.42_205.1747m/z  | 205.1747 | 3.42 (1,1- <sup>2</sup> H <sub>2</sub> )Silinane | CSID24607656 |
| 3.46_167.0921m/z  | 167.0921 | 3.46 l-Deoxy-L-mannitol                          | CSID392801   |
| 3.46_391.2437m/z  | 391.2437 | 3.46 Carboprost                                  | CSID4444532  |
| 3.46_947.4947m/z  | 947.4947 | 3.46 Nafronyl oxalate                            | CSID17512    |
| 3.47_147.1208m/z  | 147.1208 | 3.47 n-Dibutyl sulfide                           | CSID10536    |
| 3.50_279.1598m/z  | 279.1598 | 3.5 Dibutyl phthalate                            | CSID13837319 |
| 3.52_195.1222m/z  | 195.1222 | 3.52 Acetylglutamine                             | CSID388732   |
| 3.52_614.3711m/z  | 614.3711 | 3.52 Indinavir                                   | CSID4515036  |
| 3.54_292.1073m/z  | 292.1073 | 3.54 Ritalin hydrochloride                       | CSID8923     |
| 3.57_565.1883m/z  | 565.1883 | 3.57 Agrostophyllin                              | CSID391049   |
| 3.57_431.2552m/z  | 431.2552 | 3.57 Quingestanol acetate                        | CSID17136    |
| 3.62_273.2254m/z  | 273.2254 | 3.62 Trimethylsilyl laurate                      | CSID455029   |
| 3.63_231.1250m/z  | 231.125  | 3.63 Tirasemtiv                                  | CSID30790768 |
| 3.65_484.3077m/z  | 484.3077 | 3.65 Lithocholic acid taurine conjugate          | CSID388820   |
| 3.69_183.0746m/z  | 183.0746 | 3.69 Daminozide                                  | CSID14593    |
| 3.70_169.1424m/z  | 169.1424 | 3.7 Triethylenetetramine                         | CSID21106175 |
| 3.73_163.1230m/z  | 163.123  | 3.73 2,5-Dihydropyridine                         | CSID10609350 |
| 3.73_193.0967m/z  | 193.0967 | 3.73 Acanthoside                                 | CSID390929   |
| 3.73_497.2635m/z  | 497.2635 | 3.73 HISTIDYLPROLINE DIKETOPIPERAZINE            | CSID58646    |
| 3.73_189.1018m/z  | 189.1018 | 3.73 Phenazone                                   | CSID2121     |
| 3.73_949.5183m/z  | 949.5183 | 3.73 TRECETILIDE FUMARATE                        | CSID4945347  |
| 3.75_433.2695m/z  | 433.2695 | 3.75 Norethisterone enanthate                    | CSID199613   |
| 3.77_599.3405m/z  | 599.3405 | 3.77 Emixustat hydrochloride                     | CSID28529449 |
| 3.78_396.7474m/z  | 396.7474 | 3.78 immunomycin                                 | CSID4445297  |
| 3.80_229.1662m/z  | 229.1662 | 3.8 4-Nitrosopiperidine                          | CSID30778640 |

|                   |          |                                     |              |
|-------------------|----------|-------------------------------------|--------------|
| 3.80_973.5337m/z  | 973.5337 | 3.8 Prednisolone valerate acetate   | CSID4447657  |
| 3.81_343.2469m/z  | 343.2469 | 3.81 PALMOXIRATE SODIUM             | CSID2301081  |
| 3.82_219.9920m/z  | 219.992  | 3.82 4-Nitrophenyl hydrogen sulfate | CSID72581    |
| 3.83_341.1545m/z  | 341.1545 | 3.83 3-Biphenylol                   | CSID10903    |
| 3.83_303.0807m/z  | 303.0807 | 3.83 Methionylmethionine            | CSID94154    |
| 3.83_652.6597m/z  | 652.6597 | 3.83 N-tetracosanoylsphinganine     | CSID4446690  |
| 3.85_969.5758m/z  | 969.5758 | 3.85 Stigmatellin Y                 | CSID4445302  |
| 3.90_543.3270m/z  | 543.327  | 3.9 CUCURBITACIN P                  | CSID390404   |
| 3.90_535.1761m/z  | 535.1761 | 3.9 Propenidazole                   | CSID4950302  |
| 3.95_341.2089m/z  | 341.2089 | 3.95 Cyathin A3                     | CSID390575   |
| 4.00_724.3849m/z  | 724.3849 | 4 Kitasamycin                       | CSID4445382  |
| 4.01_229.1150m/z  | 229.115  | 4.01 Actinamine                     | CSID30791624 |
| 4.04_229.1671m/z  | 229.1671 | 4.04 dicyclohexylcarbodiimide       | CSID10408    |
| 4.05_461.3110m/z  | 461.311  | 4.05 Dodecanedioic acid             | CSID12213    |
| 4.07_1497.8070m/z | 1497.807 | 4.07 Pfaffoside A                   | CSID30791205 |
| 4.08_595.2006m/z  | 595.2006 | 4.08 Neoponcirin                    | CSID16498764 |
| 4.09_271.0758m/z  | 271.0758 | 4.09 10-Oxabenzo(def)chrysen-9-one  | CSID320641   |
| 4.09_433.1350m/z  | 433.135  | 4.09 aconitate F                    | CSID24606457 |
| 4.10_961.0148m/z  | 961.0148 | 4.1 Ponceau SX                      | CSID30790997 |
| 4.11_213.1008m/z  | 213.1008 | 4.11 (-)-Cytisine                   | CSID9818     |
| 4.11_230.1269m/z  | 230.1269 | 4.11 Arenaine                       | CSID2769416  |
| 4.11_455.2785m/z  | 455.2785 | 4.11 Latanoprost                    | CSID4470740  |
| 4.12_979.5573m/z  | 979.5573 | 4.12 isomigrastatin                 | CSID13083250 |
| 4.13_877.9670m/z  | 877.967  | 4.13 Triacantanol                   | CSID62194    |
| 4.15_449.1454m/z  | 449.1454 | 4.15 trinexapac                     | CSID10469309 |
| 4.16_1061.5870m/z | 1061.587 | 4.16 gambiertyxin-4b                | CSID10366292 |
| 4.16_321.1529m/z  | 321.1529 | 4.16 Pimelic acid                   | CSID376      |
| 4.17_966.0168m/z  | 966.0168 | 4.17 7,9-Dotriacantanediol          | CSID35013339 |
| 4.21_725.4116m/z  | 725.4116 | 4.21 1,1,4,4-TETRAPHENYLBUTANE      | CSID120741   |
| 4.22_379.2173m/z  | 379.2173 | 4.22 Cebranopadol                   | CSID29398942 |
| 4.22_1037.5866m/z | 1037.587 | 4.22 Sativanine B                   | CSID4444916  |
| 4.23_183.0864m/z  | 183.0864 | 4.23 D-Sorbitol                     | CSID107748   |

|                     |           |                                                          |              |
|---------------------|-----------|----------------------------------------------------------|--------------|
| 4. 27_585. 3189m/z  | 585. 3189 | 4. 27 Lappaconitine                                      | CSID390345   |
| 4. 32_755. 4338m/z  | 755. 4338 | 4. 32 Carmegliptin                                       | CSID9592454  |
| 4. 39_141. 1100m/z  | 141. 11   | 4. 39 5-Silaspiro[4. 4]nonane                            | CSID24607728 |
| 4. 39_201. 1344m/z  | 201. 1344 | 4. 39 Gyromitrin                                         | CSID7827534  |
| 4. 40_820. 9592m/z  | 820. 9592 | 4. 4 Bisolvon                                            | CSID4642584  |
| 4. 40_1136. 1228m/z | 1136. 123 | 4. 4 C04977SRJ5                                          | CSID4446686  |
| 4. 40_653. 3687m/z  | 653. 3687 | 4. 4 Etymemazine                                         | CSID64847    |
| 4. 40_645. 3620m/z  | 645. 362  | 4. 4 taleranol                                           | CSID20916    |
| 4. 41_122. 0730m/z  | 122. 073  | 4. 41 Bisphenol B                                        | CSID59553    |
| 4. 41_335. 1733m/z  | 335. 1733 | 4. 41 lycaconitine                                       | CSID390347   |
| 4. 50_613. 3725m/z  | 613. 3725 | 4. 5 Lasalocid A                                         | CSID4514598  |
| 4. 51_124. 0885m/z  | 124. 0885 | 4. 51 geroquinol                                         | CSID4445151  |
| 4. 56_540. 6350m/z  | 540. 635  | 4. 56 Hexachlorocyclopentadiene                          | CSID6233     |
| 4. 56_335. 1683m/z  | 335. 1683 | 4. 56 N-cyclopropylammeline                              | CSID4881949  |
| 4. 59_872. 9954m/z  | 872. 9954 | 4. 59 Technetium (99mTc) bicisate                        | CSID4805172  |
| 4. 61_230. 1271m/z  | 230. 1271 | 4. 61 Arenaine                                           | CSID2769416  |
| 4. 61_147. 1203m/z  | 147. 1203 | 4. 61 n-Dibutyl sulfide                                  | CSID10536    |
| 4. 63_697. 3964m/z  | 697. 3964 | 4. 63 (+)-Ingenol                                        | CSID10282511 |
| 4. 63_122. 0729m/z  | 122. 0729 | 4. 63 Bisphenol B                                        | CSID59553    |
| 4. 63_357. 1914m/z  | 357. 1914 | 4. 63 DIGITALIN                                          | CSID390432   |
| 4. 63_713. 3756m/z  | 713. 3756 | 4. 63 Pibutidine                                         | CSID4445602  |
| 4. 63_1227. 7615m/z | 1227. 762 | 4. 63 Tetrahexosylceramide (d18:1/16:0)                  | CSID16744945 |
| 4. 64_153. 0913m/z  | 153. 0913 | 4. 64 prosolanapyrone II                                 | CSID9997508  |
| 4. 64_154. 0866m/z  | 154. 0866 | 4. 64 Ruxolitinib                                        | CSID25027389 |
| 4. 67_229. 1672m/z  | 229. 1672 | 4. 67 dicyclohexylcarbodiimide                           | CSID10408    |
| 4. 67_505. 3249m/z  | 505. 3249 | 4. 67 Dipyridamole                                       | CSID2997     |
| 4. 68_212. 0520m/z  | 212. 052  | 4. 68 Sodium 4-Aminosalicylate Dihydrate                 | CSID4445547  |
| 4. 69_872. 9950m/z  | 872. 995  | 4. 69 Technetium (99mTc) bicisate                        | CSID4805172  |
| 4. 71_738. 4380m/z  | 738. 438  | 4. 71 2, 2', 3, 3', 4, 5', 6-HEPTABROMODIPHENYL<br>ETHER | CSID30791500 |
| 4. 71_217. 0625m/z  | 217. 0625 | 4. 71 Anthrone                                           | CSID6751     |
| 4. 71_182. 1122m/z  | 182. 1122 | 4. 71 Cortisol                                           | CSID5551     |

|                    |          |                                          |              |
|--------------------|----------|------------------------------------------|--------------|
| 4. 71_264.0885m/z  | 264.0885 | 4. 71 dimethylthiambutene                | CSID10218    |
| 4. 71_271.0784m/z  | 271.0784 | 4. 71 mecysteine                         | CSID27113    |
| 4. 72_490.2936m/z  | 490.2936 | 4. 72 Buprenorphine                      | CSID559124   |
| 4. 73_124.0887m/z  | 124.0887 | 4. 73 geroquinol                         | CSID4445151  |
| 4. 73_346.1889m/z  | 346.1889 | 4. 73 LYSERGIDE, L-                      | CSID3843     |
| 4. 75_315.0902m/z  | 315.0902 | 4. 75 Sulfaphenazole                     | CSID5144     |
| 4. 79_271.0778m/z  | 271.0778 | 4. 79 S-Methylcysteine                   | CSID196235   |
| 4. 81_659.3741m/z  | 659.3741 | 4. 81 EUROPINE                           | CSID4575419  |
| 4. 84_930.1864m/z  | 930.1864 | 4. 84 3-Oxo-octanoyl-CoA                 | CSID10140155 |
| 4. 84_122.0731m/z  | 122.0731 | 4. 84 Bisphenol B                        | CSID59553    |
| 4. 84_208.1146m/z  | 208.1146 | 4. 84 deacetylvindoline                  | CSID228679   |
| 4. 84_125.0683m/z  | 125.0683 | 4. 84 N-Nitrosodiethylamine              | CSID5708     |
| 4. 84_305.1735m/z  | 305.1735 | 4. 84 prosolanapyrone II                 | CSID9997508  |
| 4. 84_901.1801m/z  | 901.1801 | 4. 84 Tedizolid Phosphate                | CSID9651289  |
| 4. 91_262.0638m/z  | 262.0638 | 4. 91 Cicletanine                        | CSID49583    |
| 4. 91_865.5116m/z  | 865.5116 | 4. 91 Hydrocortisone butyrate (JP15/USP) | CSID24344    |
| 4. 92_360.2159m/z  | 360.2159 | 4. 92 Fenpiverinium                      | CSID64566    |
| 4. 97_461.1184m/z  | 461.1184 | 4. 97 Spiraprilat                        | CSID2298317  |
| 5. 01_812.9635m/z  | 812.9635 | 5. 01 Diclazuril                         | CSID401855   |
| 5. 02_208.1150m/z  | 208.115  | 5. 02 deacetylvindoline                  | CSID228679   |
| 5. 02_801.4293m/z  | 801.4293 | 5. 02 Ifenprodil tartrate                | CSID570951   |
| 5. 02_125.0682m/z  | 125.0682 | 5. 02 N-Nitrosodiethylamine              | CSID5708     |
| 5. 03_122.0731m/z  | 122.0731 | 5. 03 Bisphenol B                        | CSID59553    |
| 5. 03_949.0142m/z  | 949.0142 | 5. 03 DIGUANOSINE-PENTAPHOSPHATE         | CSID4484327  |
| 5. 03_1494.8246m/z | 1494.825 | 5. 03 Ganglioside GD3 (d18:1/18:0)       | CSID16744913 |
| 5. 03_163.1051m/z  | 163.1051 | 5. 03 Levobupivacaine Hydrochloride      | CSID105409   |
| 5. 04_320.1093m/z  | 320.1093 | 5. 04 Duloxetine                         | CSID54822    |
| 5. 07_357.2030m/z  | 357.203  | 5. 07 Prostaglandin B2                   | CSID4444404  |
| 5. 08_641.0320m/z  | 641.032  | 5. 08 Lonidamine                         | CSID36170    |
| 5. 08_325.1274m/z  | 325.1274 | 5. 08 Phe-his                            | CSID14892541 |
| 5. 11_213.1054m/z  | 213.1054 | 5. 11 albutoin                           | CSID2297355  |
| 5. 11_230.1271m/z  | 230.1271 | 5. 11 Arenaine                           | CSID2769416  |

|                  |          |                               |              |
|------------------|----------|-------------------------------|--------------|
| 5.11_627.3822m/z | 627.3822 | 5.11 Heliotrine               | CSID792587   |
| 5.18_341.1557m/z | 341.1557 | 5.18 Fortimicin FU-10         | CSID30791545 |
| 5.18_329.1566m/z | 329.1566 | 5.18 S-methyl-L-methionine    | CSID128519   |
| 5.20_122.0731m/z | 122.0731 | 5.2 Bisphenol B               | CSID59553    |
| 5.20_208.1145m/z | 208.1145 | 5.2 deacetylvindoline         | CSID228679   |
| 5.20_431.2207m/z | 431.2207 | 5.2 Mexiletine hydrochloride  | CSID20175    |
| 5.21_852.5132m/z | 852.5132 | 5.21 alpha-chaconine          | CSID391274   |
| 5.21_195.1326m/z | 195.1326 | 5.21 Arcaine                  | CSID2141     |
| 5.21_125.0681m/z | 125.0681 | 5.21 N-Nitrosodiethylamine    | CSID5708     |
| 5.21_305.1736m/z | 305.1736 | 5.21 prosolanapyrone II       | CSID9997508  |
| 5.24_682.4273m/z | 682.4273 | 5.24 Aridanin                 | CSID65922    |
| 5.24_245.1329m/z | 245.1329 | 5.24 Triphenylmethane         | CSID10169    |
| 5.28_344.2009m/z | 344.2009 | 5.28 N,N-Didesmethyltamoxifen | CSID2300247  |
| 5.30_784.5289m/z | 784.5289 | 5.3 IRGANOX 3114              | CSID84061    |
| 5.30_222.1483m/z | 222.1483 | 5.3 mazipredone               | CSID5840     |
| 5.30_111.0783m/z | 111.0783 | 5.3 pentanol                  | CSID6040     |
| 5.30_226.1062m/z | 226.1062 | 5.3 Rhizocticin B             | CSID30791558 |
| 5.30_168.1141m/z | 168.1141 | 5.3 sinularin                 | CSID10469721 |
| 5.31_417.1770m/z | 417.177  | 5.31 (-)-Brucine              | CSID390579   |
| 5.38_195.1330m/z | 195.133  | 5.38 Arcaine                  | CSID2141     |
| 5.38_208.1152m/z | 208.1152 | 5.38 deacetylvindoline        | CSID228679   |
| 5.38_770.9976m/z | 770.9976 | 5.38 indisulam                | CSID187608   |
| 5.38_153.0913m/z | 153.0913 | 5.38 prosolanapyrone II       | CSID9997508  |
| 5.42_399.2285m/z | 399.2285 | 5.42 Pyrimethanil             | CSID82753    |
| 5.43_186.1220m/z | 186.122  | 5.43 artilide                 | CSID116301   |
| 5.43_229.1680m/z | 229.168  | 5.43 dicyclohexylcarbodiimide | CSID10408    |
| 5.43_169.1426m/z | 169.1426 | 5.43 Triethylenetetramine     | CSID21106175 |
| 5.47_222.1494m/z | 222.1494 | 5.47 mazipredone              | CSID5840     |
| 5.47_168.1143m/z | 168.1143 | 5.47 sinularin                | CSID10469721 |
| 5.48_461.3131m/z | 461.3131 | 5.48 Dodecanedioic acid       | CSID12213    |
| 5.50_795.4618m/z | 795.4618 | 5.5 Drotaverine               | CSID1361582  |
| 5.53_195.1332m/z | 195.1332 | 5.53 Arcaine                  | CSID2141     |

|                     |           |                                         |              |
|---------------------|-----------|-----------------------------------------|--------------|
| 5. 57_230. 1272m/z  | 230. 1272 | 5. 57 Arenaine                          | CSID2769416  |
| 5. 62_222. 1487m/z  | 222. 1487 | 5. 62 mazipredone                       | CSID5840     |
| 5. 67_937. 0186m/z  | 937. 0186 | 5. 67 tartrazine acid                   | CSID56098    |
| 5. 68_195. 1332m/z  | 195. 1332 | 5. 68 Arcaine                           | CSID2141     |
| 5. 72_255. 0806m/z  | 255. 0806 | 5. 72 sulfadicramide                    | CSID7980     |
| 5. 77_199. 1529m/z  | 199. 1529 | 5. 77 (~2~H_5_)Phenol                   | CSID21170779 |
| 5. 77_245. 1279m/z  | 245. 1279 | 5. 77 (+)-Etomidate                     | CSID580864   |
| 5. 77_414. 2428m/z  | 414. 2428 | 5. 77 Astragaloside II                  | CSID30790840 |
| 5. 77_146. 1018m/z  | 146. 1018 | 5. 77 INOCOTERONE ACETATE               | CSID5293176  |
| 5. 77_583. 3542m/z  | 583. 3542 | 5. 77 Perlapine                         | CSID15291    |
| 5. 87_975. 5084m/z  | 975. 5084 | 5. 87 Erythromycin stinoprate           | CSID64401    |
| 5. 92_352. 1735m/z  | 352. 1735 | 5. 92 EUROPINE                          | CSID4575419  |
| 5. 92_541. 2990m/z  | 541. 299  | 5. 92 nostopeptolide A1                 | CSID8971518  |
| 5. 95_682. 4287m/z  | 682. 4287 | 5. 95 Aridanin                          | CSID65922    |
| 5. 95_183. 1168m/z  | 183. 1168 | 5. 95 Bibenzyl                          | CSID7364     |
| 5. 95_344. 2011m/z  | 344. 2011 | 5. 95 N,N-Didesmethyltamoxifen          | CSID2300247  |
| 5. 97_539. 1449m/z  | 539. 1449 | 5. 97 Evoxanthidine                     | CSID391204   |
| 5. 97_551. 1265m/z  | 551. 1265 | 5. 97 Liriodenine                       | CSID9738     |
| 6. 01_407. 0962m/z  | 407. 0962 | 6. 01 Lancerin                          | CSID4444964  |
| 6. 02_583. 0340m/z  | 583. 034  | 6. 02 Brimonidine                       | CSID2341     |
| 6. 05_715. 0692m/z  | 715. 0692 | 6. 05 Chlorsulfuron                     | CSID43209    |
| 6. 08_718. 9345m/z  | 718. 9345 | 6. 08 Tetrakis(pentafluorophenyl)silane | CSID375930   |
| 6. 09_1065. 1773m/z | 1065. 177 | 6. 09 dTDP-beta-D-oliose                | CSID30791082 |
| 6. 09_375. 3965m/z  | 375. 3965 | 6. 09 Pentacosane                       | CSID11900    |
| 6. 12_309. 1037m/z  | 309. 1037 | 6. 12 Dexsotalol hydrochloride          | CSID144864   |
| 6. 14_1153. 2344m/z | 1153. 234 | 6. 14 Regrelor disodium                 | CSID9448186  |
| 6. 14_551. 1283m/z  | 551. 1283 | 6. 14 Sivelestat Sodium tetrahydrate    | CSID139682   |
| 6. 15_183. 1139m/z  | 183. 1139 | 6. 15 cyclohexylbenzen                  | CSID12674    |
| 6. 15_654. 2009m/z  | 654. 2009 | 6. 15 Elagolix sodium                   | CSID23954980 |
| 6. 15_472. 2672m/z  | 472. 2672 | 6. 15 Erythrophleguine                  | CSID4444674  |
| 6. 15_227. 1155m/z  | 227. 1155 | 6. 15 METHYLCYTISINE                    | CSID204591   |
| 6. 15_344. 2005m/z  | 344. 2005 | 6. 15 N,N-Didesmethyltamoxifen          | CSID2300247  |



|                   |          |                                         |              |
|-------------------|----------|-----------------------------------------|--------------|
| 6.15_583.3550m/z  | 583.355  | 6.15 Perlapine                          | CSID15291    |
| 6.17_524.6633m/z  | 524.6633 | 6.17 Hydroxyapatite                     | CSID14098    |
| 6.17_285.1115m/z  | 285.1115 | 6.17 Solvent Brown 1                    | CSID56367    |
| 6.18_1289.3250m/z | 1289.325 | 6.18 MS15642725                         | CSID8502319  |
| 6.19_1185.7263m/z | 1185.726 | 6.19 Agavoside A                        | CSID390452   |
| 6.19_195.1333m/z  | 195.1333 | 6.19 Arcaine                            | CSID2141     |
| 6.19_1039.1446m/z | 1039.145 | 6.19 Cefminox                           | CSID64286    |
| 6.19_239.1618m/z  | 239.1618 | 6.19 Nonyl 2-hydroxypropanoate          | CSID14190419 |
| 6.19_334.1751m/z  | 334.1751 | 6.19 Primidolol                         | CSID61835    |
| 6.22_371.2434m/z  | 371.2434 | 6.22 6-ketoprostaglandin fl?            | CSID4444411  |
| 6.22_1304.3168m/z | 1304.317 | 6.22 N-tetracosanoylsphinganine         | CSID4446690  |
| 6.23_685.0696m/z  | 685.0696 | 6.23 boscalid                           | CSID184713   |
| 6.24_353.1397m/z  | 353.1397 | 6.24 3-O-methyl-8-prenylgalangin        | CSID4445224  |
| 6.24_1329.7663m/z | 1329.766 | 6.24 Phytolaccoside B                   | CSID390513   |
| 6.26_725.4462m/z  | 725.4462 | 6.26 Calpeptin                          | CSID66091    |
| 6.26_727.1240m/z  | 727.124  | 6.26 Cyclic pyranopterine monophosphate | CSID17221217 |
| 6.27_720.7950m/z  | 720.795  | 6.27 Clodronate Disodium                | CSID21332554 |
| 6.27_539.1459m/z  | 539.1459 | 6.27 Evoxanthidine                      | CSID391204   |
| 6.27_701.1895m/z  | 701.1895 | 6.27 Sucrose octaacetate                | CSID29073    |
| 6.28_167.0852m/z  | 167.0852 | 6.28 Fluorene                           | CSID6592     |
| 6.29_741.1434m/z  | 741.1434 | 6.29 flavodic acid                      | CSID64953    |
| 6.31_709.7087m/z  | 709.7087 | 6.31 Methyl Behenate                    | CSID12995    |
| 6.33_1241.2432m/z | 1241.243 | 6.33 Cefditoren pivoxil                 | CSID4942398  |
| 6.33_285.1057m/z  | 285.1057 | 6.33 D-Ornalline                        | CSID388640   |
| 6.33_785.1669m/z  | 785.1669 | 6.33 PARECOXIB SODIUM                   | CSID7851185  |
| 6.34_940.0736m/z  | 940.0736 | 6.34 2,4-Dichlorobenzoyl-CoA            | CSID7822078  |
| 6.34_837.1907m/z  | 837.1907 | 6.34 Juglanin                           | CSID10365524 |
| 6.35_829.1926m/z  | 829.1926 | 6.35 Apratastat                         | CSID9627567  |
| 6.36_961.0924m/z  | 961.0924 | 6.36 eugenin                            | CSID391036   |
| 6.36_953.0909m/z  | 953.0909 | 6.36 Geraniin                           | CSID10270376 |
| 6.36_1223.7416m/z | 1223.742 | 6.36 Zizyphine A                        | CSID4884461  |
| 6.37_859.2105m/z  | 859.2105 | 6.37 Besifloxacin hydrochloride         | CSID8400086  |

|                   |          |                                         |              |
|-------------------|----------|-----------------------------------------|--------------|
| 6.37_651.0693m/z  | 651.0693 | 6.37 Urothion                           | CSID78342    |
| 6.39_697.1000m/z  | 697.1    | 6.39 2'-Inosinic acid                   | CSID18556963 |
| 6.39_525.0062m/z  | 525.0062 | 6.39 4-Bromobenzhydrol                  | CSID88691    |
| 6.39_891.0262m/z  | 891.0262 | 6.39 Bis(5'-guanosyl) tetraphosphate    | CSID144813   |
| 6.39_725.4467m/z  | 725.4467 | 6.39 Calpeptin                          | CSID66091    |
| 6.39_866.1985m/z  | 866.1985 | 6.39 hexanoyl-CoA                       | CSID395736   |
| 6.39_844.9861m/z  | 844.9861 | 6.39 INDIGOTINDISULFONIC ACID           | CSID4445584  |
| 6.39_325.1309m/z  | 325.1309 | 6.39 NICOFETAMIDE                       | CSID2298538  |
| 6.39_551.0071m/z  | 551.0071 | 6.39 sulfoglucobrassicin                | CSID390219   |
| 6.39_383.2476m/z  | 383.2476 | 6.39 tetrofosmin                        | CSID4124     |
| 6.42_685.0967m/z  | 685.0967 | 6.42 Thiophanate-methyl                 | CSID2297683  |
| 6.44_707.1283m/z  | 707.1283 | 6.44 Glyparamide                        | CSID216134   |
| 6.44_828.9788m/z  | 828.9788 | 6.44 Isoconazole                        | CSID3629     |
| 6.46_916.2103m/z  | 916.2103 | 6.46 Octanoyl-coa                       | CSID393007   |
| 6.46_735.1284m/z  | 735.1284 | 6.46 sanguinarium chloride              | CSID61894    |
| 6.47_325.2385m/z  | 325.2385 | 6.47 6-Decylubiquinol                   | CSID10128484 |
| 6.47_1300.2786m/z | 1300.279 | 6.47 Ceramide (dl8:1/24:0)              | CSID4446684  |
| 6.47_749.1240m/z  | 749.124  | 6.47 Iguratimod                         | CSID110694   |
| 6.48_757.1559m/z  | 757.1559 | 6.48 Ritipenem acoxil hydrate           | CSID10128319 |
| 6.52_417.1766m/z  | 417.1766 | 6.52 L-Kynurenine                       | CSID141580   |
| 6.52_1189.2265m/z | 1189.227 | 6.52 losulazine hydrochloride           | CSID49455    |
| 6.53_271.0753m/z  | 271.0753 | 6.53 10-Oxabenzo(def)chrysen-9-one      | CSID320641   |
| 6.54_405.1219m/z  | 405.1219 | 6.54 2-cis,6-trans-farnesyl diphosphate | CSID393244   |
| 6.54_891.0248m/z  | 891.0248 | 6.54 Bis(5'-guanosyl) tetraphosphate    | CSID144813   |
| 6.54_817.1754m/z  | 817.1754 | 6.54 Tetracenomycin E                   | CSID391881   |
| 6.55_841.1939m/z  | 841.1939 | 6.55 1,3,4,5-Tetracaffeoylquinic acid   | CSID21864723 |
| 6.56_551.1510m/z  | 551.151  | 6.56 betanin                            | CSID10128200 |
| 6.56_795.1723m/z  | 795.1723 | 6.56 Faropenem medoxomil                | CSID5293428  |
| 6.56_943.1982m/z  | 943.1982 | 6.56 Zeniplatin                         | CSID30791805 |
| 6.58_863.2262m/z  | 863.2262 | 6.58 clidinium bromide                  | CSID17942    |
| 6.58_1313.3253m/z | 1313.325 | 6.58 Teniposide                         | CSID31930    |
| 6.60_741.7729m/z  | 741.7729 | 6.6 1,24-Tetracosanediol                | CSID21121019 |

|                   |          |                                       |              |
|-------------------|----------|---------------------------------------|--------------|
| 6.60_419.1121m/z  | 419.1121 | 6.6 AVERUFIN DIMETHYL ETHER           | CSID35013930 |
| 6.60_737.1127m/z  | 737.1127 | 6.6 Diacerein                         | CSID24456    |
| 6.60_723.1159m/z  | 723.1159 | 6.6 Midazolam HCl                     | CSID39217    |
| 6.62_597.1618m/z  | 597.1618 | 6.62 mefenacet [JMAF]                 | CSID82816    |
| 6.65_252.2154m/z  | 252.2154 | 6.65 2-Hexaprenylphenol               | CSID4444372  |
| 6.66_283.1250m/z  | 283.125  | 6.66 methaphenilene                   | CSID9884     |
| 6.67_733.1056m/z  | 733.1056 | 6.67 Malvidin Chloride                | CSID62718    |
| 6.67_852.1809m/z  | 852.1809 | 6.67 Pentanoyl-CoA                    | CSID10140116 |
| 6.69_1129.1603m/z | 1129.16  | 6.69 dTDP-D-glucose                   | CSID388455   |
| 6.70_513.1964m/z  | 513.1964 | 6.7 Phenylgalactoside                 | CSID92439    |
| 6.70_943.1998m/z  | 943.1998 | 6.7 Zeniplatin                        | CSID30791805 |
| 6.73_611.1597m/z  | 611.1597 | 6.73 Multinoside A                    | CSID10248307 |
| 6.76_885.2009m/z  | 885.2009 | 6.76 DARGLITAZONE SODIUM              | CSID54853    |
| 6.77_904.8758m/z  | 904.8758 | 6.77 Fipronil Sulfone                 | CSID2336427  |
| 6.79_790.1406m/z  | 790.1406 | 6.79 Cefotiam hexetil hydrochloride   | CSID153019   |
| 6.80_171.0303m/z  | 171.0303 | 6.8 p-Xylylenedithiol                 | CSID59434    |
| 6.83_219.1855m/z  | 219.1855 | 6.83 1,2,5-TRIMETHYLPYRROLE           | CSID63445    |
| 6.84_237.0793m/z  | 237.0793 | 6.84 2-(4'-methylthio)butylmalic acid | CSID24808074 |
| 6.84_266.1397m/z  | 266.1397 | 6.84 Glycerol phenylbutyrate          | CSID8657541  |
| 6.84_255.0978m/z  | 255.0978 | 6.84 N-(3,4-Dihydroxyphenyl)glutamine | CSID35032872 |
| 6.86_237.1606m/z  | 237.1606 | 6.86 Metabutethamine                  | CSID10644    |
| 6.87_286.9693m/z  | 286.9693 | 6.87 fenticlor                        | CSID7052     |
| 6.94_171.1011m/z  | 171.1011 | 6.94 1-(3-Furyl)-1,4-pentanediol      | CSID19991118 |
| 6.94_1111.1239m/z | 1111.124 | 6.94 4'-demethylrebeccamycin          | CSID25052047 |
| 6.94_1248.2544m/z | 1248.254 | 6.94 N-docosanoylsphinganine          | CSID4446688  |
| 6.99_295.2408m/z  | 295.2408 | 6.99 neoabietadiene                   | CSID391686   |
| 7.01_1127.1685m/z | 1127.169 | 7.01 Aclidinium bromide               | CSID9694529  |
| 7.03_315.0704m/z  | 315.0704 | 7.03 1-Salicylate glucuronide         | CSID2341148  |
| 7.03_1035.1282m/z | 1035.128 | 7.03 Fenticonazole nitrate            | CSID46839    |
| 7.04_231.2126m/z  | 231.2126 | 7.04 BUTYL BORATE                     | CSID12189    |
| 7.06_353.1122m/z  | 353.1122 | 7.06 Miraxanthin-III                  | CSID30791226 |
| 7.06_313.1781m/z  | 313.1781 | 7.06 octyl methoxycinnamate           | CSID4511170  |

|                  |          |                                                                          |              |
|------------------|----------|--------------------------------------------------------------------------|--------------|
| 7.09_300.1738m/z | 300.1738 | 7.09 Emixustat hydrochloride                                             | CSID28529449 |
| 7.14_525.1277m/z | 525.1277 | 7.14 5-Fluorouridine                                                     | CSID9056     |
| 7.14_183.0801m/z | 183.0801 | 7.14 Carlina oxide                                                       | CSID144325   |
| 7.18_717.2161m/z | 717.2161 | 7.18 Chryso-obtusin                                                      | CSID136879   |
| 7.19_609.1366m/z | 609.1366 | 7.19 (3-Chlorophenyl) (9H-fluoren-2-yl)methanone                         | CSID2309061  |
| 7.20_401.2340m/z | 401.234  | 7.2 Marinobufagenin                                                      | CSID10142870 |
| 7.20_209.1075m/z | 209.1075 | 7.2 spironolactone                                                       | CSID5628     |
| 7.23_346.2713m/z | 346.2713 | 7.23 Linoleoyl Ethanolamide                                              | CSID4446566  |
| 7.23_930.0738m/z | 930.0738 | 7.23 Tritriacontane                                                      | CSID11905    |
| 7.27_717.2315m/z | 717.2315 | 7.27 Lactobionic acid                                                    | CSID7040     |
| 7.31_421.1177m/z | 421.1177 | 7.31 caulerpin                                                           | CSID4481120  |
| 7.31_551.1333m/z | 551.1333 | 7.31 Mahuannin D                                                         | CSID24842675 |
| 7.34_530.8284m/z | 530.8284 | 7.34 Chromium(III) chloride hexahydrate                                  | CSID94714    |
| 7.36_371.1376m/z | 371.1376 | 7.36 alstonine                                                           | CSID390543   |
| 7.36_357.3012m/z | 357.3012 | 7.36 Dibutyl tridecanedioate                                             | CSID15276619 |
| 7.37_391.2798m/z | 391.2798 | 7.37 Dolichotheline                                                      | CSID147033   |
| 7.48_191.1172m/z | 191.1172 | 7.48 (-)-Cytisine                                                        | CSID9818     |
| 7.53_423.3755m/z | 423.3755 | 7.53 Plakinamine A                                                       | CSID10243262 |
| 7.61_301.2533m/z | 301.2533 | 7.61 allylestrenol                                                       | CSID205855   |
| 7.64_221.1621m/z | 221.1621 | 7.64 CYCLURON                                                            | CSID15694    |
| 7.64_161.1406m/z | 161.1406 | 7.64 methacholine                                                        | CSID1916     |
| 7.64_731.2107m/z | 731.2107 | 7.64 sanggenon C                                                         | CSID390896   |
| 7.64_339.2838m/z | 339.2838 | 7.64 SM(d18:0/14:0)                                                      | CSID24846886 |
| 7.66_322.2720m/z | 322.272  | 7.66 3-ketosphinganine                                                   | CSID388895   |
| 7.66_209.0214m/z | 209.0214 | 7.66 Angelicin                                                           | CSID10208    |
| 7.66_433.0798m/z | 433.0798 | 7.66 Bensulfuron-methyl [ANSI, WSSA]                                     | CSID49630    |
| 7.66_299.1981m/z | 299.1981 | 7.66 Stearidonic acid                                                    | CSID4471933  |
| 7.69_662.1094m/z | 662.1094 | 7.69 ELZASONAN CITRATE                                                   | CSID5005618  |
| 7.71_179.1581m/z | 179.1581 | 7.71 (~ <sup>2</sup> H <sub>4</sub> )-1,2-Ethanediylbis(trimethylsilane) | CSID24607845 |
| 7.71_677.1196m/z | 677.1196 | 7.71 lonapalene                                                          | CSID50751    |

|                    |           |                                                          |              |
|--------------------|-----------|----------------------------------------------------------|--------------|
| 7. 78_275. 1747m/z | 275. 1747 | 7. 78 Allyxycarb                                         | CSID21446    |
| 7. 81_244. 1292m/z | 244. 1292 | 7. 81 Naluzotan hydrochloride                            | CSID28530504 |
| 7. 82_429. 2281m/z | 429. 2281 | 7. 82 HARMALINE                                          | CSID10211258 |
| 7. 84_373. 1496m/z | 373. 1496 | 7. 84 beta-Syringin                                      | CSID4475831  |
| 7. 88_567. 1677m/z | 567. 1677 | 7. 88 Cucumopine                                         | CSID390236   |
| 7. 89_277. 2285m/z | 277. 2285 | 7. 89 Etidocaine                                         | CSID34400    |
| 7. 89_335. 2332m/z | 335. 2332 | 7. 89 fenalamide                                         | CSID19480    |
| 7. 89_295. 2386m/z | 295. 2386 | 7. 89 neoabietadiene                                     | CSID391686   |
| 7. 90_777. 5134m/z | 777. 5134 | 7. 9 rutamycin                                           | CSID16735943 |
| 7. 94_219. 1828m/z | 219. 1828 | 7. 94 12-Aminododecanenitrile                            | CSID11500520 |
| 7. 94_309. 1139m/z | 309. 1139 | 7. 94 quinaldonitrile                                    | CSID66650    |
| 7. 97_518. 1673m/z | 518. 1673 | 7. 97 Nicomorphine                                       | CSID4515048  |
| 7. 98_183. 1107m/z | 183. 1107 | 7. 98 L-beta-homolysine                                  | CSID2042257  |
| 7. 98_311. 1628m/z | 311. 1628 | 7. 98 Nafenopin                                          | CSID18456    |
| 7. 98_220. 0976m/z | 220. 0976 | 7. 98 Radezolid                                          | CSID9399462  |
| 7. 98_329. 1753m/z | 329. 1753 | 7. 98 Raspberry ketone                                   | CSID20347    |
| 7. 99_209. 2001m/z | 209. 2001 | 7. 99 (2, 2, 6, 6- <sup>2</sup> H <sub>4</sub> )Silinane | CSID24607714 |
| 7. 99_387. 2169m/z | 387. 2169 | 7. 99 robustadial A                                      | CSID140023   |
| 8. 11_210. 1592m/z | 210. 1592 | 8. 11 Dimethirimol                                       | CSID20014    |
| 8. 28_335. 2282m/z | 335. 2282 | 8. 28 Fortimicin AP                                      | CSID30791541 |
| 8. 30_429. 2647m/z | 429. 2647 | 8. 3 Dicirenone                                          | CSID8563314  |
| 8. 30_232. 1042m/z | 232. 1042 | 8. 3 Mapracorat                                          | CSID25104194 |
| 8. 30_233. 1105m/z | 233. 1105 | 8. 3 renillafoulin A                                     | CSID30791734 |
| 8. 32_293. 2253m/z | 293. 2253 | 8. 32 3-Methyl-1-phenyl-2-butene                         | CSID19372    |
| 8. 38_385. 2359m/z | 385. 2359 | 8. 38 Megestrol acetate                                  | CSID11192    |
| 8. 42_297. 2570m/z | 297. 257  | 8. 42 Ectocarpene                                        | CSID28290131 |
| 8. 46_292. 1376m/z | 292. 1376 | 8. 46 ambuphylline                                       | CSID20536    |
| 8. 48_327. 0193m/z | 327. 0193 | 8. 48 Diclofop                                           | CSID35447    |
| 8. 49_553. 1396m/z | 553. 1396 | 8. 49 (+)-Ketoconazole                                   | CSID401695   |
| 8. 62_324. 2888m/z | 324. 2888 | 8. 62 Linoleoyl Ethanolamide                             | CSID4446566  |
| 8. 65_277. 2282m/z | 277. 2282 | 8. 65 Etidocaine                                         | CSID34400    |
| 8. 75_213. 0674m/z | 213. 0674 | 8. 75 (E)-butocarboxim                                   | CSID4514630  |

|                   |                   |                                           |              |
|-------------------|-------------------|-------------------------------------------|--------------|
| 8.75_329.1530m/z  | 329.153           | 8.75 tiapride                             | CSID5268     |
| 8.84_213.0683m/z  | 213.0683          | 8.84 Isobutyl 2-chlorobenzoate            | CSID193012   |
| 9.32_421.2296m/z  | 421.2296          | 9.32 Levocabastine                        | CSID16736421 |
| 9.38_291.2076m/z  | 291.2076          | 9.38 4'-Hydroxyropivacaine                | CSID30791783 |
| 9.39_271.2163m/z  | 271.2163          | 9.39 Levoamphetamine                      | CSID30477    |
| 9.67_428.2572n    | 428.2572 429.2645 | 9.67 Dicirenone                           | CSID8563314  |
| 9.69_327.0916m/z  | 327.0916          | 9.69 Vicine                               | CSID82575    |
| 9.73_320.2327m/z  | 320.2327          | 9.73 Dalcotidine                          | CSID114542   |
| 9.90_581.1705m/z  | 581.1705          | 9.9 Alatrofloxacin                        | CSID21243647 |
| 10.37_588.2603m/z | 588.2603          | 10.37 Coelichelin                         | CSID2497530  |
| 10.37_537.2433m/z | 537.2433          | 10.37 Pentostatin                         | CSID388759   |
| 10.38_591.2039m/z | 591.2039          | 10.38 Cindunistat hydrochloride maleate   | CSID30790737 |
| 10.40_497.2406m/z | 497.2406          | 10.4 6-Hydroxymelatonin                   | CSID1794     |
| 10.40_246.1230m/z | 246.123           | 10.4 Cyclohexyl 4-azidobenzoate           | CSID24606652 |
| 10.40_376.1910m/z | 376.191           | 10.4 Cyphenothrin                         | CSID35087    |
| 10.40_326.0905m/z | 326.0905          | 10.4 Flumazenil                           | CSID3256     |
| 10.40_345.1136m/z | 345.1136          | 10.4 Menadione                            | CSID3915     |
| 10.41_261.2789m/z | 261.2789          | 10.41 3-Octanol                           | CSID11043    |
| 10.41_149.1027m/z | 149.1027          | 10.41 Acetohydrazide                      | CSID13420    |
| 10.41_281.6549m/z | 281.6549          | 10.41 Ergocornine                         | CSID66155    |
| 10.41_261.1447m/z | 261.1447          | 10.41 L-gamma-Glutamyl-L-leucine          | CSID133115   |
| 10.41_362.1168m/z | 362.1168          | 10.41 Metampicillin                       | CSID5145919  |
| 10.41_234.0644m/z | 234.0644          | 10.41 Milrinone                           | CSID4052     |
| 10.41_476.2562n   | 476.2562 477.2826 | 10.41 Voalla                              | CSID4447597  |
| 10.42_637.1709m/z | 637.1709          | 10.42 Leiocarposide                       | CSID137456   |
| 10.42_353.1094m/z | 353.1094          | 10.42 Miraxanthin-III                     | CSID30791226 |
| 10.45_605.2291m/z | 605.2291          | 10.45 Oxantel pamoate                     | CSID4444539  |
| 10.46_262.0608m/z | 262.0608          | 10.46 clomazone                           | CSID49469    |
| 10.46_524.2413m/z | 524.2413          | 10.46 Diaplasinin                         | CSID4953370  |
| 10.65_391.2826m/z | 391.2826          | 10.65 Dolichotheline                      | CSID147033   |
| 10.81_369.2389m/z | 369.2389          | 10.81 Perindopril                         | CSID96956    |
| 10.86_291.2409m/z | 291.2409          | 10.86 1-(12-Aminododecyl)-2-pyrrolidinone | CSID13595965 |

|                    |          |                                                                     |              |
|--------------------|----------|---------------------------------------------------------------------|--------------|
| 10.93_259.0747m/z  | 259.0747 | 10.93 Northienamycin                                                | CSID116957   |
| 10.93_203.1153m/z  | 203.1153 | 10.93 Rilmenidine                                                   | CSID61963    |
| 10.93_262.1511m/z  | 262.1511 | 10.93 ser-arg                                                       | CSID8032215  |
| 11.05_402.3729m/z  | 402.3729 | 11.05 16,28-Secosolanidan-3-ol,<br>(3.beta.,5.alpha.)-              | CSID20042855 |
| 11.08_376.1316m/z  | 376.1316 | 11.08 Papaverine hydrochloride                                      | CSID5859     |
| 11.08_300.0851m/z  | 300.0851 | 11.08 phosphopantothenic acid                                       | CSID128      |
| 11.09_241.0848m/z  | 241.0848 | 11.09 Flavidin                                                      | CSID139512   |
| 11.56_281.0630m/z  | 281.063  | 11.56 2-Fluorobenzoic acid                                          | CSID9547     |
| 11.56_207.0407m/z  | 207.0407 | 11.56 2-hydroxydibenzofuran                                         | CSID59956    |
| 11.57_355.0861m/z  | 355.0861 | 11.57 Butamifos                                                     | CSID34329    |
| 11.94_209.1985m/z  | 209.1985 | 11.94 1-Methyl(2,2,5,5- <sup>2</sup> H <sub>4</sub> )silolane       | CSID24607719 |
| 11.94_205.2039m/z  | 205.2039 | 11.94 3-Methyl(2,2,5,5- <sup>2</sup> H <sub>4</sub> )cyclopentanone | CSID24607197 |
| 11.95_177.1720m/z  | 177.172  | 11.95 (2,2,5,5- <sup>2</sup> H <sub>4</sub> )Cyclopentanone         | CSID10430752 |
| 11.95_181.1668m/z  | 181.1668 | 11.95 1,1-diethyl-2-n-amyldiazine                                   | CSID486997   |
| 11.95_265.2649m/z  | 265.2649 | 11.95 3,5-Dimethyl-1-dodecylpyrazole                                | CSID498252   |
| 11.95_337.1934m/z  | 337.1934 | 11.95 Methylclostebol                                               | CSID197559   |
| 11.95_271.0966m/z  | 271.0966 | 11.95 pinostrobin                                                   | CSID65961    |
| 12.06_355.0853m/z  | 355.0853 | 12.06 Butamifos                                                     | CSID34329    |
| 12.14_641.9554m/z  | 641.9554 | 12.14 Cefotetan disodium                                            | CSID47903    |
| 12.25_825.8644m/z  | 825.8644 | 12.25 8,10-Heptacosanediol                                          | CSID23255606 |
| 12.27_723.1630m/z  | 723.163  | 12.27 sparsomycin                                                   | CSID7822406  |
| 12.34_175.1562m/z  | 175.1562 | 12.34 Muscarine                                                     | CSID8949     |
| 12.37_439.3554m/z  | 439.3554 | 12.37 g-Tokoferol                                                   | CSID14266    |
| 12.37_289.2647m/z  | 289.2647 | 12.37 Tedisamil                                                     | CSID59237    |
| 12.41_269.1152m/z  | 269.1152 | 12.41 (-)-Irofulven                                                 | CSID130640   |
| 12.42_1221.3085m/z | 1221.309 | 12.42 Multinoside A                                                 | CSID10248307 |
| 12.42_809.2066m/z  | 809.2066 | 12.42 Zopiclone N-oxide                                             | CSID142713   |
| 12.44_187.1093m/z  | 187.1093 | 12.44 cis-Jasmone                                                   | CSID1266012  |
| 12.44_303.2307m/z  | 303.2307 | 12.44 Linoleic acid                                                 | CSID4444105  |

|                    |          |                                                                |              |
|--------------------|----------|----------------------------------------------------------------|--------------|
| 12.44_133.0967m/z  | 133.0967 | 12.44 L-Ornithine                                              | CSID6026     |
| 12.49_803.0502m/z  | 803.0502 | 12.49 S-(1,2-Dichlorovinyl)glutathione                         | CSID4941923  |
| 12.50_223.0752m/z  | 223.0752 | 12.5 2-Methylanthraquinone                                     | CSID6515     |
| 12.51_355.0862m/z  | 355.0862 | 12.51 Butamifos                                                | CSID34329    |
| 12.51_429.1086m/z  | 429.1086 | 12.51 Penamecillin                                             | CSID8426255  |
| 12.51_445.1439m/z  | 445.1439 | 12.51 thr-cys                                                  | CSID16568389 |
| 12.52_207.0421m/z  | 207.0421 | 12.52 2-hydroxydibenzofuran                                    | CSID59956    |
| 12.54_737.1919m/z  | 737.1919 | 12.54 ketazolam                                                | CSID31110    |
| 12.54_653.0920m/z  | 653.092  | 12.54 Prebetanin                                               | CSID4885085  |
| 12.58_581.0440m/z  | 581.044  | 12.58 UDP-alpha-D-glucuronic acid                              | CSID16522    |
| 12.69_353.3206m/z  | 353.3206 | 12.69 Heptylbenzene                                            | CSID13492    |
| 12.72_922.1677m/z  | 922.1677 | 12.72 2-Naphthoyl-CoA                                          | CSID10138057 |
| 12.73_878.1232m/z  | 878.1232 | 12.73 5-hydroxy-2-furoyl-CoA                                   | CSID21864787 |
| 12.75_717.5103m/z  | 717.5103 | 12.75 pregnenolone acetate                                     | CSID2005918  |
| 12.77_1135.7636m/z | 1135.764 | 12.77 5-O-Mycaminosyprotylonolide                              | CSID10278511 |
| 12.86_177.1733m/z  | 177.1733 | 12.86 (2,2,5,5- <sup>2</sup> H <sub>4</sub> )Cyclopentanone    | CSID10430752 |
| 12.86_209.2002m/z  | 209.2002 | 12.86 1-Methyl(2,2,5,5- <sup>2</sup> H <sub>4</sub> )silolane  | CSID24607719 |
| 12.86_139.1200m/z  | 139.12   | 12.86 3-Methyl-1,5-pentanediamine                              | CSID10645088 |
| 12.86_167.1545m/z  | 167.1545 | 12.86 3-Methyl-2,3-dihydro-1H-pyrrole                          | CSID14172782 |
| 12.86_223.2160m/z  | 223.216  | 12.86 Heptanonitril                                            | CSID11866    |
| 12.86_153.1367m/z  | 153.1367 | 12.86 Heptylhydrazine                                          | CSID16608    |
| 12.92_439.3567m/z  | 439.3567 | 12.92 13,28-Epoxyurs-11-en-3-one                               | CSID35013781 |
| 12.96_263.2495m/z  | 263.2495 | 12.96 1-Methyl-1-( <sup>2</sup> H <sub>3</sub> )methylsilinane | CSID24607660 |
| 12.99_626.0870m/z  | 626.087  | 12.99 (R)-afoxolaner                                           | CSID30790744 |
| 12.99_795.2235m/z  | 795.2235 | 12.99 Rivoglitazone                                            | CSID2316729  |
| 13.00_597.0706m/z  | 597.0706 | 13 diquat dibromide                                            | CSID25613    |
| 13.01_1127.3151m/z | 1127.315 | 13.01 Daunorubicin hydrochloride                               | CSID56512    |
| 13.01_663.1460m/z  | 663.146  | 13.01 Deoxyadenosine monophosphate                             | CSID12079    |
| 13.01_1245.3901m/z | 1245.39  | 13.01 Pectolinarin                                             | CSID147700   |



|                    |          |                                       |              |
|--------------------|----------|---------------------------------------|--------------|
| 13.02_713.1693m/z  | 713.1693 | 13.02 Penicillin G Sodium Salt        | CSID6014     |
| 13.03_1025.2513m/z | 1025.251 | 13.03 Temocapril hydrochloride        | CSID391963   |
| 13.04_677.4552m/z  | 677.4552 | 13.04 Ganglioside GA1 (d18:1/25:0)    | CSID17216301 |
| 13.04_751.2065m/z  | 751.2065 | 13.04 Parishin B                      | CSID23551088 |
| 13.06_1243.8552m/z | 1243.855 | 13.06 Diethanolamine fusidate         | CSID30791487 |
| 13.06_633.4240m/z  | 633.424  | 13.06 Ganglioside GM3 (d18:1/24:0)    | CSID16744868 |
| 13.06_825.0797m/z  | 825.0797 | 13.06 mallotinic acid                 | CSID8231698  |
| 13.06_327.0918m/z  | 327.0918 | 13.06 Vicine                          | CSID82575    |
| 13.09_355.0865m/z  | 355.0865 | 13.09 Butamifos                       | CSID34329    |
| 13.16_351.2255m/z  | 351.2255 | 13.16 Fucoxanthin acetate             | CSID24607918 |
| 13.21_441.2672m/z  | 441.2672 | 13.21 15-Crown-5                      | CSID33416    |
| 13.25_675.4127m/z  | 675.4127 | 13.25 Danazol                         | CSID26436    |
| 13.27_243.1556m/z  | 243.1556 | 13.27 Tris(hydroxymethyl)aminomethane | CSID6257     |
| 13.31_679.4464m/z  | 679.4464 | 13.31 (-)-noracymethadol              | CSID119159   |
| 13.33_763.5353m/z  | 763.5353 | 13.33 sphinganine 1-phosphate         | CSID559277   |
| 13.36_613.3738m/z  | 613.3738 | 13.36 Compactin diol lactone          | CSID151560   |
| 13.40_849.5757m/z  | 849.5757 | 13.4 alpha-Phocaecholic acid          | CSID167853   |
| 13.40_631.4610m/z  | 631.461  | 13.4 Zinc stearate                    | CSID10705    |
| 13.42_812.6350m/z  | 812.635  | 13.42 Bromosulphophthalein            | CSID5152     |
| 13.43_784.6147m/z  | 784.6147 | 13.43 2,3,3',4,4',5,5'-PCB            | CSID35108    |
| 13.43_745.0434m/z  | 745.0434 | 13.43 Clazuril                        | CSID53093    |
| 13.45_761.5215m/z  | 761.5215 | 13.45 Enisoprost                      | CSID4470738  |
| 13.47_251.0581m/z  | 251.0581 | 13.47 9,10-DICYANOANTHRACENE          | CSID64194    |
| 13.47_327.0942m/z  | 327.0942 | 13.47 INDOLEACETYL GLUTAMIC ACID      | CSID28567151 |
| 13.48_339.2000m/z  | 339.2    | 13.48 Atrazine-desethyl-2-hydroxy     | CSID96906    |
| 13.50_673.4670m/z  | 673.467  | 13.5 Hepoxilin A3                     | CSID4446332  |
| 13.53_1151.3240m/z | 1151.324 | 13.53 Novclobiocin 105                | CSID30791079 |
| 13.54_1107.2932m/z | 1107.293 | 13.54 Iodoxamide tromethamine         | CSID9367206  |

|                    |          |                                                     |              |
|--------------------|----------|-----------------------------------------------------|--------------|
| 13.55_1283.4127m/z | 1283.413 | 13.55 Cyclothialidine                               | CSID391757   |
| 13.58_743.1902m/z  | 743.1902 | 13.58 Ampicillin sodium                             | CSID389889   |
| 13.58_680.9971m/z  | 680.9971 | 13.58 Fosfructose                                   | CSID150604   |
| 13.58_437.3439m/z  | 437.3439 | 13.58 Methyl 2-<br>[(trimethylsilyl)oxy]icosanoate  | CSID457355   |
| 13.59_1179.3556m/z | 1179.356 | 13.59 Novclobiocin 104                              | CSID30791078 |
| 13.60_665.1210m/z  | 665.121  | 13.6 Sulfadimethoxine Sodium                        | CSID64667    |
| 13.63_421.3479m/z  | 421.3479 | 13.63 Trimethylsilyl 19-methylicosanoate            | CSID24606304 |
| 13.67_1485.5444m/z | 1485.544 | 13.67 (-)-syringaresinol 0,0'-bis(beta-D-glucoside) | CSID391147   |
| 13.70_855.1284m/z  | 855.1284 | 13.7 cefpodoxime                                    | CSID4514925  |
| 13.73_668.7898m/z  | 668.7898 | 13.73 Chlorethoxyfos                                | CSID82758    |
| 13.73_351.2230m/z  | 351.223  | 13.73 Fucoxanthin acetate                           | CSID24607918 |
| 13.73_741.1836m/z  | 741.1836 | 13.73 Kandelin A2                                   | CSID391043   |
| 13.75_321.1456m/z  | 321.1456 | 13.75 Auraptene                                     | CSID1267148  |
| 13.75_501.0815m/z  | 501.0815 | 13.75 Demeclocycline hydrochloride                  | CSID10482189 |
| 13.75_645.0726m/z  | 645.0726 | 13.75 Digallic acid                                 | CSID334      |
| 13.75_621.7248m/z  | 621.7248 | 13.75 Docosane                                      | CSID11899    |
| 13.75_813.1882m/z  | 813.1882 | 13.75 Lancerin                                      | CSID4444964  |
| 13.75_229.9084m/z  | 229.9084 | 13.75 Nitrapyrin                                    | CSID15205    |
| 13.75_100.9636m/z  | 100.9636 | 13.75 Perchloric acid                               | CSID22669    |
| 13.79_130.0161m/z  | 130.0161 | 13.79 3-Amino-6-chloropyridazine                    | CSID20342    |
| 13.83_196.8981m/z  | 196.8981 | 13.83 Halothane                                     | CSID3441     |
| 13.92_262.8707m/z  | 262.8707 | 13.92 Diammonium tetrathioxomolybdate(2-)           | CSID21251162 |
